# Supplementary material for: A coral-like nano-PCF composite as a broad-bandwidth microwave absorber
Source: Royal Society of Chemistry journal article supplement (doi:10.1039/d3ma01189e), 2024-01-01
Supplement: d3ma01189e1.pdf [file d3ma01189e1.pdf]

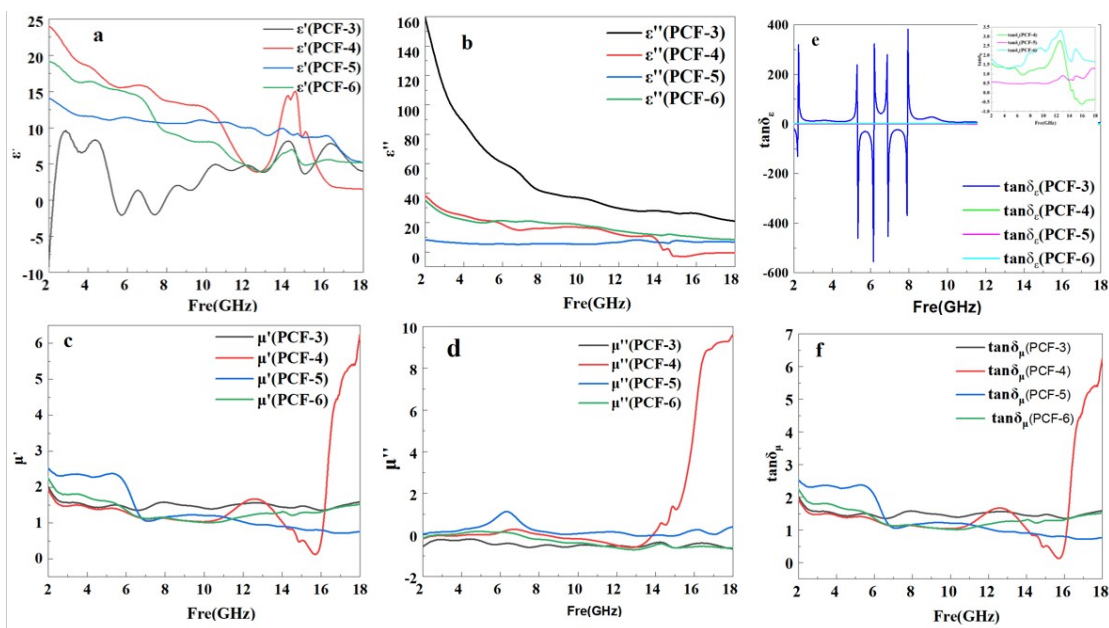

Fig. S1 a, b, e and c, d, f was the real, image and tangent of permeability and permittivity of PCF-3, PCF-4, PCF-5 and PCF-6, respectively.
